# Supplementary material for: Pentapyrrolic calix[4]pyrroleElectronic supplementary information (ESI) available: NMR titration plots; experimental section. See http://www.rsc.org/suppdata/cc/b3/b303959e/
Source: Royal Society of Chemistry journal article supplement (doi:10.1039/b303959e), 2003-01-01
Supplement: b303959e.doc [file b303959e.doc]

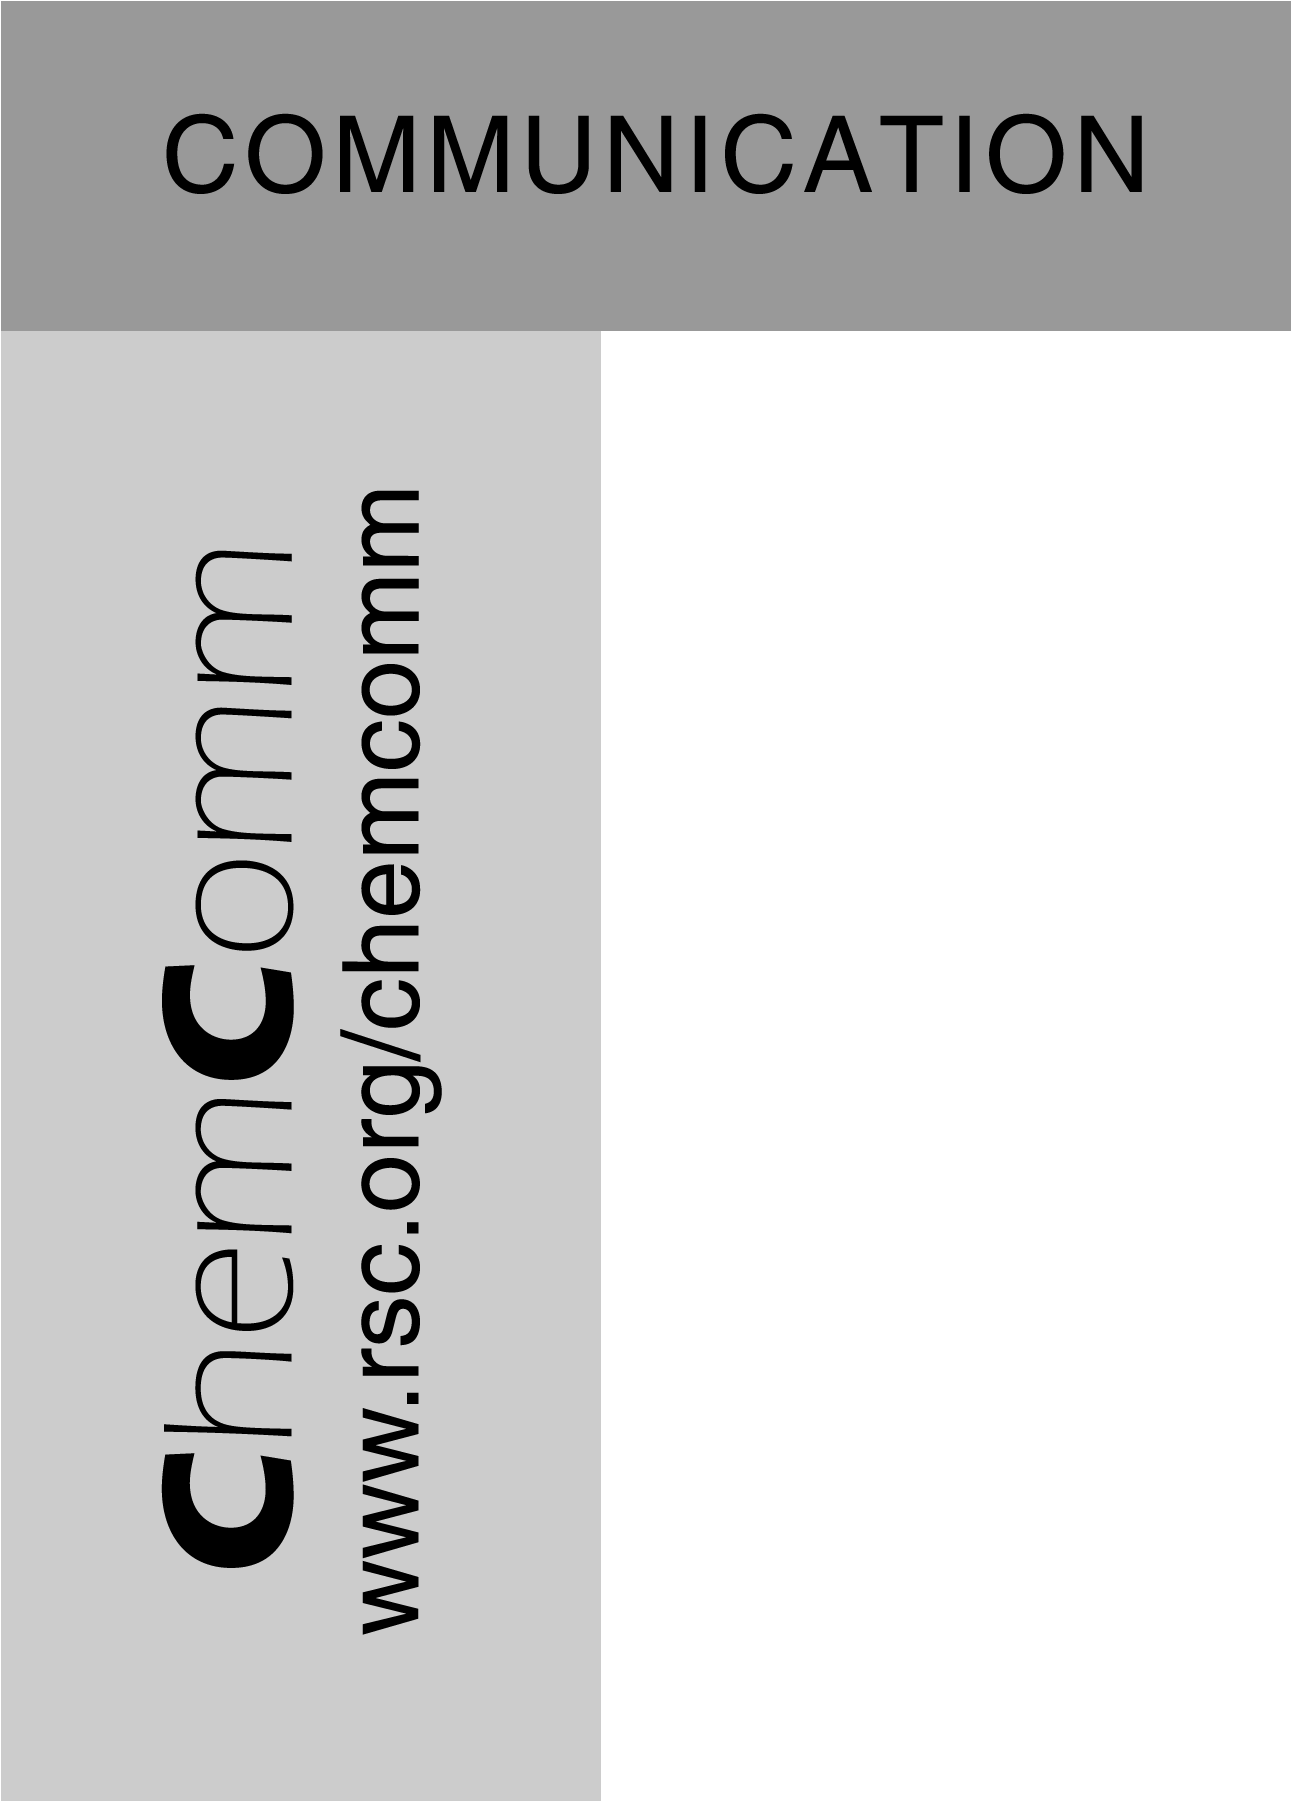
Pentapyrrolic calix[4]pyrrole

Colin N. Warriner, Philip A. Gale,* Mark E. Light and Michael B. Hursthouse

School of Chemistry, University of Southampton, Southampton, SO17 1BJ, UK. Fax: +44 23 80596805; Tel: +44 23 80593332; E-mail: philip.gale@soton.ac.uk

SUPPLEMENTARY INFORMATION

### NMR titration plots

# Compound 1 – Stability constants in (M-1) Concentration in (M)

**Compound 2** Stability constants in (M-1) Concentration in (M)

**Experimental**

**Compound 4**

2-Acetyl-3,4,5-tribromopyrrole (2.5g, 0.0073 mol) and pyrrole (75ml 1.07 mol) were stirred in methanol (150 ml) under nitrogen. The solution was degassed for 15 minutes and the solution heated to 80C. Methanesulfonic acid (200 l) was added and the solution heated for 30 minutes. After cooling, 0.1M sodium hydroxide solution in water (200 ml) was added. Brine (150ml) was added to the aqueous solution which was then extracted with dichloromethane (5 x 150ml). The organic solution was washed with brine (4x75ml) then dried with magnesium sulfate and the organic solvent removed *in vacuo*. The resulting dark solution was dried under high vacuum using an in-line trap to remove the last of the remaining pyrrole:methanol solution giving a dark viscous oil. Acetone (20ml) and hexane (30ml) were added to the oil and stirred. A red solution formed suspending a dark oil, upon settling the solution was decanted and further extraction/decantation of the remaining suspension with hexane (5x100ml) gave further red solution. The hexane solution was filtered and the solvent removed *in vacuo* giving a red oil.Dichloromethane (10 ml) was added to the red oil and Hexane (60ml) to precipitate the product as an off white solid in 27% yield (0.9g). Analytically pure material was obtained by column chromatography eluting with dichloromethane on silica giving the product as a white solid. The product was crystallised from chloroform as colourless needles. M.p decomp >75C Satisfactory elemental analysis results were obtained. 1H NMR in CDCl3 400MHz,  (ppm): 2.09 (s, 3H, CH3), 6.14 (m, 2H, CH), 6.26 (m, 2H, CH), 6.73 (m, 2H, CH), 7.87 (s, 2H, NH), 7.91. (s, 2H, NH). 13C NMR in CDCl3 400MHz (ppm): 26.0, 41.8, 97.0, 97.1, 103.6, 106.6, 109.2, 117.7, 133.4, 134.6. ES+ mass spectrum, m/z, 457.8 (M-H)-, 493.8 (M+Cl)-, 571.7 (M+TFA)- HRES MS C14H11Br3N3 calc 457.8504 found 457.8498  = 9.5 ppm

**Compound 2**

In the next step, compound **4** was used crude as a red oil without further purification from the previous procedure and it was assumed that the reaction had gone to completion in an ideal yield. Compound **4**, dimethyldipyrromethane (2.5g, 0.014 mol) and acetone (1.25g, 0.021 mol) were stirred in methanol (600ml) under nitrogen and degassed for 15 minutes. Methanesulfonic acid (200 l) was added and the reaction mixture stirred overnight. Triethylamine was added to neutralise the acid. The solution was filtered to remove octamethylcalixpyrrole **1**. The methanol was evaporated down to leave 100ml, water (100 ml) and brine (100ml) were added to the solution. The aqueous phase was extracted with dichloromethane (5 x 100ml) and the organic layer dried with magnesium sulfate. The organic solvent was evaporated. Hexane (3 x 200ml) was added to the dark oil forming a red solution and dark solid that was removed by filtration. The organic solvent was removed *in vacuo*. Methanol (50ml) was added to the resulting red solid, the off white solid was removed by filtration (octamethyl-calixpyrrole). The solvent was removed *in vacuo* yielding 2g of crude product. The solid was purified by column chromatography eluting with dichloromethane on silica giving the product as a white/pink solid in 14% overall yield from 2-acetyl-3,4,5-tribromopyrrole (0.72g) M.p decomp >95C. Satisfactory elemental analysis results were obtained. 1H NMR in CD2Cl2 400MHz,  (ppm): 1.50 (s, 3H, CH3), 1.51 (s, 6H, CH3), 1.53 (s, 3H, CH3), 1.56 (s, 6H, CH3), 1.92 (s, 3H, CH3), 5.89 (m, 6H, CH), 6.00 (m, 2H, CH), 7.14 (s, 2H, NH), 7.22 (s, 2H, NH), 7.74. (s, 1H, NH). 13C NMR in CD2Cl2 400MHz (ppm): 22.7, 26.2, 26.5, 27.4, 28.4, 33.9, 40.4, 95.4, 95.5, 101.6, 101.9, 102.6, 105.3, 130.9, 134.0, 136.6, 137.3, 137.4, 138.5. ES- mass spectrum, m/z, 748 (M+Cl)-, 826 (M+TFA)- HRES MS C31H35Br3N5calc 714.0437 found 714.0429  = 1.1 ppm

**Table S1** Results of molecular modelling studies (kcal/mol) on **1** and **2** conducted using Spartan ‘02 using AM1 and PM3 forcefields and DFT on AM1 generated structures.

| Molecule Name | Eaq (kcal/mol)/MM | E (kcal/mol)/MM | E(AM1) | (DFT at AM1) | PM3 |
| --- | --- | --- | --- | --- | --- |
| Calixpyrrole 1 | 60.6745152 | 57.8888355 | 118.326968 | -820506.324 | 48.645381 |
| Calixpyrrole 1 + Acetate | -88.2450719 | 27.5774288 | -35.875809 | -963930.475 | -107.357 |
| pyrrole-calixpyrrole 2 | 61.8050549 | 61.5327431 | 182.13009 | -5770916.09 | 122.08121 |
| Pyrrole-calixpyrrole 2 + Actetate | -83.6439505 | 19.8197401 | 21.7314186 | -5914342.83 | -42.17704 |
| Acetate | -72.0380606 | 1.04907981 | -115.40732 |  |  |
|  |  |  |  |  |  |
| Calixpyrrole 1 binding energy | -76.8815265 | -31.36048651 | -38.795455 | -143424.151 | -156.0024 |
| Pyrrole-calixpyrrole 2 binding energy | -73.4109448 | -42.76208281 | -44.991349 | -143426.74 | -164.2582 |
|  |  |  |  |  |  |
| Compound 2 - Compound 1 | 3.4705817 | -11.4015963 | -6.1958948 | -2.589 | -8.255841 |

Lowest Energy Conformation of **2**-acetate (AM1)

Lowest Energy Conformation of **2**-acetate (PM3)
